# Supplementary material for: Crithmum maritimum Extract Restores Lipid Homeostasis and Metabolic Profile of Liver Cancer Cells to a Normal Phenotype
Source: PubMed Central journal article supplement (PMC11178603; doi:10.1007/s11130-024-01188-5), 2024-05-06

HepG2 Huh7

AMPK-P  
(Thr172)

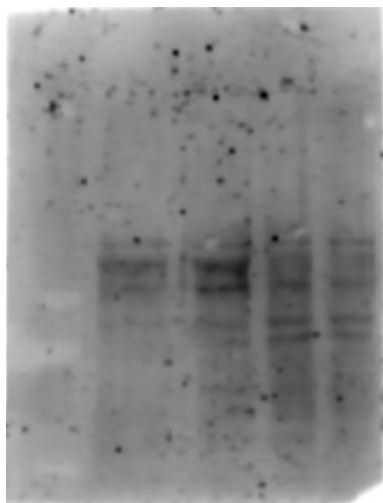

AMPK Tot

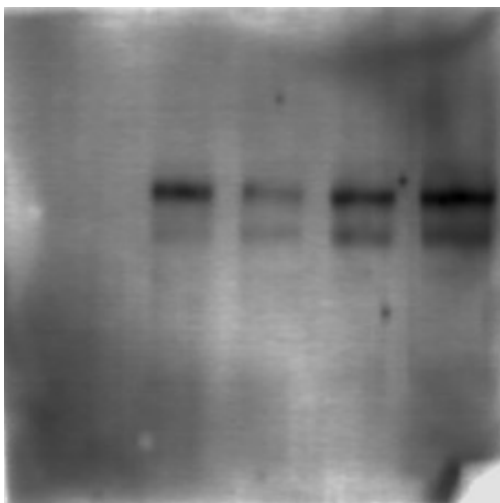

Actin

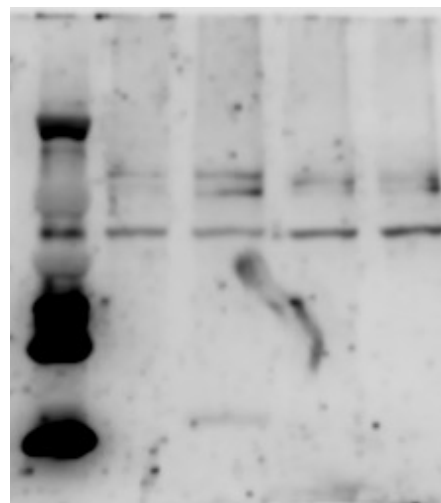

Akt-P  
(Ser473)

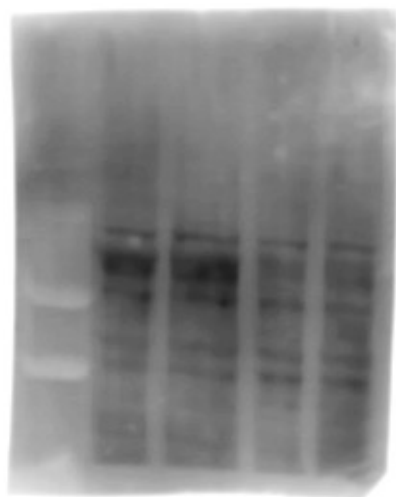

Akt Tot

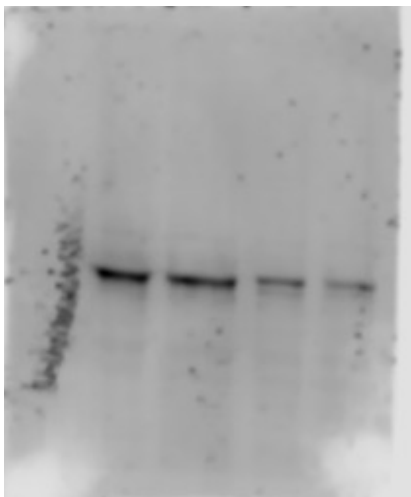

Actin

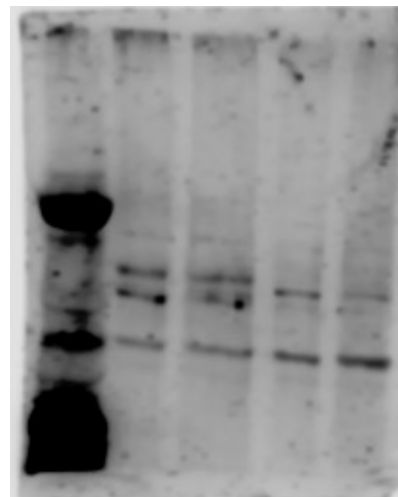

HLE HepaRG

AMPK-P  
(Thr172)

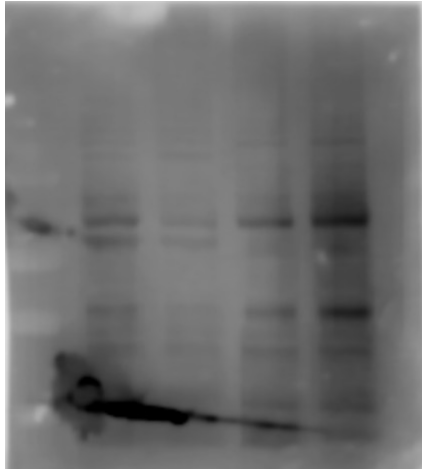

AMPK Tot

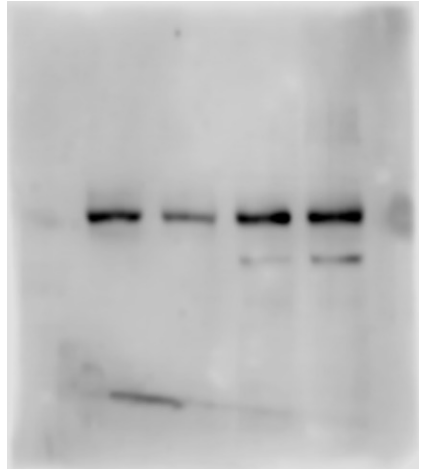

Actin

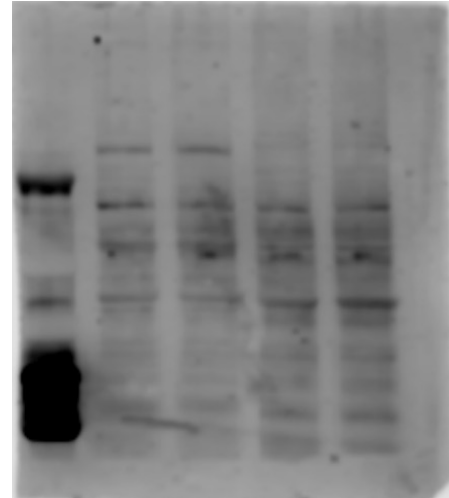

Akt-P  
(Ser473)

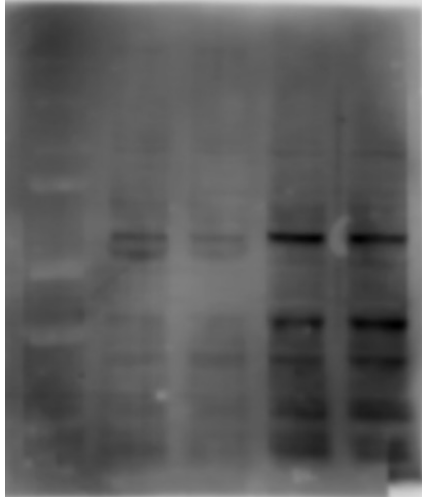

Akt Tot

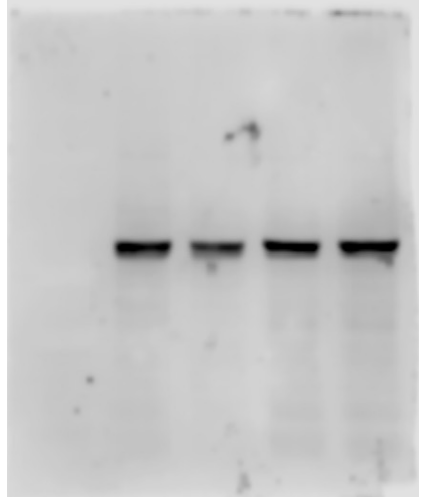

Actin

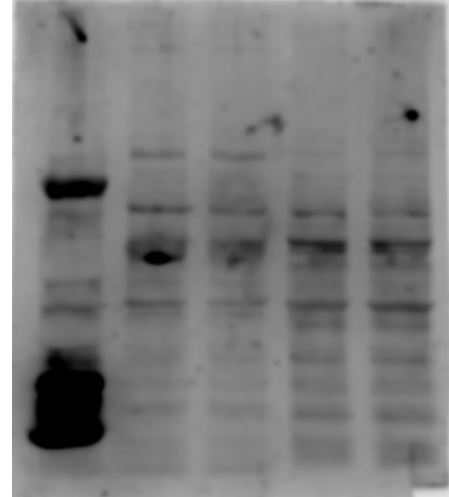

Supplement: 11130_2024_1188_MOESM2_ESM.pdf [file 11130_2024_1188_MOESM2_ESM.pdf]
